1 **Establishment and characterization of a cell line and patient-derived**  
2 **xenograft (PDX) from peritoneal metastasis of low-grade serous ovarian**  
3 **carcinoma**

4

5 **Authors:**

6 Elien De Thaye (1,2), Koen Van de Vijver (2,3), Joni Van der Meulen (2,4), Joachim Taminau (2,5),  
7 Glenn Wagemans (2,6), Hannelore Denys (2,7), Jo Van Dorpe (2,3), Geert Berx (2,5),  
8 Wim Ceelen (2,8), Jan Van Bocxlaer (1), Olivier De Wever\* (2,6)

9

10 **Affiliation of authors:**

11 (1) Laboratory of Medical Biochemistry and Clinical Analysis, Ghent University, Ghent, Belgium

12 (2) Cancer Research Institute Ghent (CRIG), Ghent, Belgium

13 (3) Department of Pathology, Ghent University Hospital, Ghent, Belgium

14 (4) Molecular Diagnostics Ghent University Hospital, Ghent, Belgium

15 (5) Molecular and Cellular Oncology lab, Ghent University, Ghent, Belgium

16 (6) Laboratory of Experimental Cancer Research, Ghent University, Ghent, Belgium

17 (7) Department of Medical Oncology, Ghent University Hospital, Ghent, Belgium

18 (8) Department of GI Surgery, Ghent University Hospital, Ghent, Belgium

19

20

21

22 **Correspondence to:** Olivier De Wever, Laboratory of Experimental Cancer Research, Department of

23 Radiation Oncology and Experimental Cancer Research, Faculty of Medicine and Health Sciences,

24 Ghent University, Corneel Heymanslaan 10, B-9000 Ghent, Belgium. Tel.: +32-9-3323073. Fax.: +32-9-

25 3324991. E-mail: [olivier.dewever@ugent.be](mailto:olivier.dewever@ugent.be)

26

27 **Abstract**

28 Peritoneal spread indicates poor prognosis in patients with serous ovarian carcinoma (SOC) and is  
29 generally treated by surgical cytoreduction and chemotherapy. Novel treatment options are urgently  
30 needed to improve patient outcome. Clinically relevant cell lines and patient-derived xenograft (PDX)  
31 models are of critical importance to therapeutic regimen evaluation. Here, a PDX model was  
32 established by orthotopic engraftment, subperitoneal tumor slurry injection, of low-grade SOC  
33 resulting in an early-stage transplantable peritoneal metastasis (PM)-PDX model. Histology confirmed  
34 the micropapillary and cribriform growth pattern with intraluminal tumor budding and positivity for  
35 PAX8 and WT1. PM-PDX dissociated cells show an epithelial morphotype with a 42h doubling time and  
36 40% colony forming efficiency, they are insensitive to estrogen signaling, low sensitive to platinum  
37 derivatives and highly sensitive to paclitaxel (IC<sub>50</sub>: 6.3 ± 2.2 nM, mean ± SE). The patient primary  
38 tumor, PM, PM-PDX and derived cell line all show a *KRAS* c.35G>T (p.(Gly12Val)) mutation and show  
39 sensitivity to the MEK inhibitor trametinib in vitro (IC<sub>50</sub>: 7.2 ± 0.5 nM, mean ± SE) and in the PM mouse  
40 model. These preclinical models closely reflecting patient tumors are useful to further elucidate LGSOC  
41 disease progression, therapy response and resistance mechanisms.

## 42 **Background**

43 Ovarian cancer, the deadliest gynecological cancer, is the eight most frequently diagnosed cancer and  
44 ranks as the eight leading cause of cancer death in women, with an estimated 300 000 new cases and  
45 185 000 deaths in 2018 worldwide (1). Ovarian cancer is a very heterogeneous disease. The most  
46 common type is high-grade serous ovarian carcinoma (HGSOC) which account for 70-75% of all ovarian  
47 malignancies (2). The vast majority are characterized by *TP53* mutations and lack mutations of *KRAS*,  
48 *BRAF* or *ERBB2*. Low-grade serous ovarian carcinoma (LGSOC) accounts for less than 5% of all ovarian  
49 serous carcinomas, other epithelial ovarian cancer types are endometrioid (8-10%), clear cell (8%),  
50 seromucinous (3%), mucinous (3%) and Brenner (1%) tumors (3). LGSOC is characterized by mutations  
51 of the *KRAS*, *BRAF* or *ERBB2* genes, in which approximately two thirds of tumors have a mutually  
52 exclusive mutation in one of these genes (4). *KRAS*, *BRAF* and *ERBB2* are upstream activators of the  
53 mitogen-activated protein kinase (MAPK) pathway, leading to cellular proliferation. As both types of  
54 cancer are associated with vague symptoms in early stages, the majority of patients present with  
55 advanced-stage disease (5). The presence of peritoneal carcinomatosis, which results from intra-  
56 abdominal metastases, is associated with the late presentation of the disease. Treatment difficulties  
57 of peritoneal metastases and the possible recurrences do both contribute to a poor prognosis of this  
58 cancer (6). Given the high relapse rate and poor prognosis of this disease, interest increases in the  
59 development of new treatment approaches (7). Therapeutic management of ovarian cancer has  
60 traditionally been based on a combination of surgery and platinum-/taxane-based chemotherapy (6).  
61 However, LGSOC is not as responsive to platinum-/taxane-based chemotherapy as HGSOC. Although a  
62 clear involvement of the MAPK pathway in the disease is demonstrated, a phase 3 study using the MEK  
63 inhibitor binimetinib showed mid-term discontinuation, most probably due to escape mechanisms  
64 leading to lack of treatment efficacy (8).

65 In every aspect of translational cancer research, from the biological aspects of the disease to the  
66 development of new treatments, the use of preclinical models is a key component. In recent years,  
67 there has been an increasing interest in the application of organoids and patient-derived xenografts

68 (PDXs) because of their high potential as an essential tool for personalized medicine (9-11). The process  
69 of generating PDXs (also known as tumorgraft models) is based on the transfer of fresh tumor tissue  
70 (primary or metastatic) from the patient directly to an immunocompromised mouse (12).  
71 Depending on the cancer type, pretreatment, amount of tissue available, molecular properties etc.,  
72 the success rate of the PDX will vary (13). The organ environment can affect tumor engraftment,  
73 highlighting the role of the site of implantation. Traditionally the tumor fragment is implanted into an  
74 area unrelated to the original tumor site, which is considered a heterotopic implantation (generally  
75 subcutaneous). On the other hand, tumor xenografts can also grow orthotopically into the  
76 corresponding anatomic region but their use is often hindered by a need for a high level of technical  
77 skills, time and cost (14). For some cancers, such as colorectal, breast, lung, pancreatic, head and neck,  
78 melanoma, gastric, ovarian, prostate and renal cancer, methodologies for PDX establishment and  
79 characterization are already described in literature with engraftment rates ranging from 9 to 90% of  
80 success (13, 15).

81 In this work, for the first time, an orthotopic PDX model, based on a subperitoneal tumor slurry  
82 injection, and cancer cell line from a peritoneal metastasis of LGSOC were established. This model  
83 showed a *KRAS* mutation and sensitivity to the MEK inhibitor trametinib demonstrating its clinical  
84 relevance to study treatment responsiveness and resistance mechanisms.

## 85 **Methods**

### 86 **Establishment of peritoneal metastasis (PM)-PDX models**

87 Fresh peritoneal tissue specimens from 10 consenting patients with metastatic serous epithelial  
88 ovarian cancer (FIGO stage III or IV) were collected at the time of debulking surgery at Ghent University  
89 Hospital, Belgium. Nine patients were diagnosed with HGSOC and one with LGSOC. The study protocol  
90 was approved by the institutional review board of the Ghent University Hospital and the trial is  
91 registered as ClinicalTrial.gov NCT02567253 with EudraCT number 2015-000418-23. Samples were  
92 processed to a tumor slurry and injected in SCID/Beige mice within 75 minutes after removal from the  
93 patient. Tumors were minced in limiting volumes of RPMI 1640 media (Life Technologies, Ghent,  
94 Belgium), supplemented with 100 U/ml penicillin and 100 µg/ml streptomycin (Life Technologies,  
95 Ghent, Belgium). After a centrifugation step at 1500×g for 3 minutes, the upper culture medium was  
96 removed and tumor tissue was suspended in 1:1 Matrigel (Corning, The Netherlands). Further, a  
97 laparotomy was performed and 50 µL of the tumor suspension using a 19G needle was injected  
98 bilateral subperitoneally in three female 4 to 5 week old SCID/Beige (C.B-17/IcrHsd-Prkdc<sup>scid</sup>Lyst<sup>tg-J</sup>)  
99 mice (Envigo, The Netherlands). Animal studies were conducted in accordance with the local  
100 committee on the Ethics of Animal Experiments (Ghent University Hospital, Ghent, Belgium [ECD  
101 15/28]). Cryopreserved tumors were minced and stored 1:1 in freezing media (90% FBS/10% DMSO)  
102 at -80°C and then in liquid nitrogen indefinitely.

### 103 **Tissue processing and immunohistochemistry**

104 Tissues collected from mice or patients were fixed overnight in neutral buffered 10% formalin solution  
105 (Sigma-Aldrich, Belgium) and processed in the lab (H&E staining) or in the tissue core facility at Ghent  
106 University Hospital (immunohistochemistry).

107

108

## 109 ***In vivo* imaging**

110 Transparent ultrasound transmission Polaris II gel (Ondes & Rayons Medical, France) was applied to  
111 bare skin and a MicroScan™ MS550D (22–55 MHz, VisualSonics Inc., Canada) transducer with the  
112 Vevo® 2100 imaging system (VisualSonics Inc., Canada) was used to analyse the tumor cross-sectional  
113 area in Vevo LAB 1.7.1 (VisualSonics Inc., Canada).

## 114 **Establishment of tumor-derived cell lines**

115 To establish cell lines derived from the peritoneal metastasis and a PM-PDX-model, tumor samples  
116 were cut into pieces of 2-4 mm and suspended using the tumor dissociation protocol with the  
117 GentleMacs® dissociator (Miltenyi Biotec GmbH, Germany). The cell suspension was applied to a cell  
118 strainer (70 µm, Corning, The Netherlands), centrifuged at 300×g for 7 minutes and after aspiration of  
119 the supernatant resuspended in complete EMEM supplemented with 10% fetal bovine serum, 100  
120 U/ml penicillin and 100 µg/ml streptomycin (Life Technologies, Ghent, Belgium). The first weeks, cells  
121 were maintained in a 6-well plate (Novolab, Belgium) before culturing in a T25 falcon at 37°C and 5%  
122 CO<sub>2</sub> in air. The cell culture was monthly tested for Mycoplasma by using MycoAlert Plus Kit (Lonza,  
123 Basel, Switzerland).

## 124 ***KRAS* mutation analysis**

125 Exons 2, 3 and 4 of the *KRAS*, *NRAS* and *HRAS* genes and exon 15 of the *BRAF* gene were analysed using  
126 a PCR-based enrichment strategy followed by library preparation and MiSeq sequencing. In brief, DNA  
127 was extracted using the QIAamp DNA Blood mini kit (Qiagen) for cell culture samples or using the  
128 QIAamp DNA FFPE Tissue kit and deparaffinisation solution (Qiagen) for formalin-fixed paraffin-  
129 embedded (FFPE) slices. The DNA concentration was measured by use of the Trinean Dropsense96  
130 UV/VIS droplet reader (Trinean) or with Qubit (Thermofisher). For the PCR, the KAPA2G Robust  
131 mastermix was used together with 0.5 µM primers and 10 ng of DNA template in a 30 µl reaction  
132 volume. The PCR protocol consists of 5 min at 95°C, 50 cycles (30 sec at 95°C, 45 sec at 60°C and 45 sec  
133 at 72°C) and 1 min at 72°C. Library preparation made use of the Nextera XT kit (Illumina) and massive

134 parallel sequencing was performed on MiSeq (Illumina) (16). All PCR and massive parallel sequencing  
135 reactions were performed in duplicate. Data-analysis was performed by use of the commercial  
136 software package CLC bio Genomics Workbench v9 (Qiagen).

#### 137 **Luciferase-EGFP transduction**

138 293T cells were cultured in DMEM (41965039, ThermoFisher) with 10% Fetal Calf Serum (FCS) (Sigma-  
139 Aldrich, St Louis, MO, USA) and 2 mM L-Glutamine (BE17-605F, Lonza) and transfected with lentiviral  
140 envelope plasmid pMD2.G, packaging plasmid psPAX2 and lentiviral expression plasmid pLenti6-  
141 LUC2CP-EGFP-Blast. The medium was removed and replaced with fresh medium 8 hours post  
142 transfection. The virus was harvested 48 hours post transfection and filtered through a 0.45 µm PES  
143 filter (Merck- Millipore, Burlington, Massachusetts, USA). PM-PDX derived cells were cultured in  
144 complete EMEM until a density of approximately 60% was reached. The medium was removed and  
145 replaced by pLenti6-LUC2CP-EGFP-Blast virus containing medium for 24 hours. Cells expressing the  
146 construct were selected after addition of 2.5 µg/ml Blasticidin S (R21001, ThermoFisher) to the  
147 medium. After 10 days the cells expressing the LUC2CP-EGFP fusion protein were sorted with the BD  
148 FACSAria III cell sorter.

#### 149 **Clonogenic assay**

150 500 PM-PDX-derived cells were seeded in different T25 cell culture flasks and immediately treated with  
151 15, 150 or 1500 pg/ml estrogen or 1, 10 or 100 nM trametinib, selumetinib or fulvestrant. Control  
152 conditions were 0.1% DMSO or stripped medium for the estrogen experiment. Cells were incubated  
153 during 8 days in the presence of the drug (3 T25 flasks/condition) and effectiveness of all agents was  
154 determined by staining the colonies using crystal violet as an endpoint measurement.

#### 155 **IncuCyte ZOOM monitored studies**

156 Real-time monitoring of cell confluency was performed using the IncuCyte ZOOM System (Essen  
157 Bioscience, Hertfordshire, UK) according to the manufacturer's guidelines. For cell confluency  
158 monitoring, cells were seeded in 96-well clear-bottom Corning® Costar® cell culture plates at 2 000

159 cells per well (100  $\mu$ L/well) and allowed to adhere 24 hours at 37°C and 5% CO<sub>2</sub> in air. Subsequently,  
160 cells were exposed to the drugs in complete EMEM medium and microscopic images (4 images/well)  
161 were taken every two hours for the duration of the experiment. All images were analysed and cell  
162 confluency was deduced using IncuCyte software. Each condition was performed in, at least, four fold.  
163 Chemotaxis cell migration was studied for SK-OV-3 luc IP1 and PM-LGSOC-01 cells using the IncuCyte™  
164 ClearView 96-Well Cell Migration plate coated with 1% Matrigel (Corning, The Netherlands) in 0% FBS  
165 EMEM medium. 3 000 cells/well were seeded (60  $\mu$ L volume) with 0.1% FBS to the top and 200  $\mu$ L 10%  
166 FBS to the bottom. Cell migration was followed using the phase contrast cell confluency monitoring.

### 167 **Cell lysates and western blotting**

168 Proteins were extracted from the cells using the Laemmli lysis buffer (0.125 M Tris-HCl, 10% glycerol,  
169 2.3% sodium dodecyl sulfate (SDS), pH 6.8). After an ultrasonication step, cell lysates were suspended  
170 in reducing sample buffer (1 M Tris-HCl, 30% glycerol, 6% SDS, 3%  $\beta$ -mercaptoethanol, 0.005%  
171 bromophenol blue, pH 6.8) and boiled for 5 minutes at 95°C. 20  $\mu$ g proteins of the cell line were  
172 exposed to a 10% SDS-PAGE gel and transferred to nitrocellulose membranes (Bio-Rad, Hercules, CA,  
173 USA). After blocking the membranes using 5% non-fat milk or bovine serum albumin (BSA) in  
174 phosphate-buffered saline (PBS) with 0.5% Tween 20 (Sigma-Aldrich, Belgium), the membranes were  
175 incubated overnight at 4°C with the primary antibodies (Table 1). After washing the membrane,  
176 incubation with HRP-conjugated secondary antibody was performed at room temperature for 1 hour.  
177 WesternBright Quantum HRP substrate (Advansta, Menlo Park, CA, USA) was added to the membranes  
178 to capture the luminescent signal using the Proxima 2850 Imager (IsoGen Life Sciences, De Meern, The  
179 Netherlands). Equal loading of samples was verified by primary monoclonal mouse anti-GAPDH  
180 antibodies (clone GAPDH-71.1, Sigma-Aldrich, Belgium).

### 181 ***In vivo* PM-PDX-derived cell line model and animal study**

182 Female 4-week-old SCID/Beige (C.B-17/IcrHsd-Prkdc<sup>scid</sup>Lyst<sup>bg-J</sup>) mice (Envigo, The Netherlands) were  
183 treated daily via oral gavage with vehicle (0.5% methylcellulose and 0.2% Tween 80 in water, n = 6) or



184 trametinib (0.3 mg/kg/day, n = 6). Mice were treated starting 1 week after intraperitoneal injection of  
185  $1 \times 10^6$  Luciferase-EGFP expressing PM-PDX-derived cells (1:1 serum free EMEM medium:Matrigel  
186 (Corning, The Netherlands)). After 5 weeks of oral treatment, mice were sacrificed. Tumour  
187 development was assessed by weekly bioluminescence imaging until six weeks after cell injection. In  
188 order to measure bioluminescent signals, mice were given an intraperitoneal injection of 100  $\mu$ L  
189 Xenolight D-luciferin (K<sup>+</sup> Salt, Perkin Elmer, Belgium) in DPBS (without Ca<sup>2+</sup> and Mg<sup>2+</sup>, 150 mg/kg  
190 mouse) and were anaesthetized with isoflurane (5% in oxygen for induction and 1.5% in oxygen for  
191 maintenance, IsoFlo, Abbott, Belgium). Imaging was initiated 15 minutes after injection using the IVIS  
192 Lumina II (Caliper Life Sciences). Exposure times were set automatically.

### 193 **Statistical analysis**

194 Results obtained with the colony formation assay were analysed using one-way ANOVA with Tukey's  
195 multiple comparisons test using Graphpad Prism 7 (GraphPad Software, USA). Using R Studio (17),  
196 Mann-Whitney U test was used to compare differences in relative total flux between groups in the *in*  
197 *vivo* experiment. Statistical tests were two-sided and p-value below 0.05 was considered statistically  
198 relevant. In figures, \* represents p-value  $\leq 0.05$ , \*\* p-value  $\leq 0.01$  and \*\*\* p-value  $\leq 0.001$ .

199

## 200 **Results**

### 201 **A low grade serous ovarian carcinoma (LGSOC) peritoneal metastasis (PM)-PDX model**

202 Figure 1A illustrates the establishment of the LGSOC PM-PDX model. Based on the observed increase  
203 in high-density signal from the ultrasound imaging (Figure 1B), it was decided to passage the tumor  
204 tissue to a new group of acceptor mice 46 days after injection. This second passage was monitored  
205 over 3 months but no changes in high-density ultrasound signal was demonstrated. At day 146 post  
206 implantation, a macroscopically blister-like appearance of the tumor area was observed which was  
207 formalin fixed and processed for (immuno)histology. H&E revealed the micropapillary and cribriform  
208 growth pattern typical for LGSOC surrounded by a large mass of stroma in the first PDX passage. In the  
209 second PDX passage this micropapillary pattern dominated the tumor area showing a single layer of  
210 epithelium forming a large lumen (Figure 1C). This micropapillary pattern was further characterized by  
211 intraluminal tumor budding. Immunohistochemical stainings for paired box gene 8 (PAX8), WT1, tumor  
212 suppressor protein p53, estrogen receptor (ER) and progesterone receptor (PR) further confirmed the  
213 typical characteristics of LGSOC (Figure 1D).

### 214 **Characterization of tumor-derived cell lines**

215 Primary culture from single cell suspension of patient-derived peritoneal metastasis resulted in spread-  
216 polarized cells that typically showed signs of senescence characterized by a larger surface area and  
217 stress fibers (Figure 2A). These cultures showed a mixed expression of cytoskeletal proteins alfa-  
218 smooth muscle actin and cytokeratin and cell-cell adhesion molecules epithelial (E-) and neural (N-)  
219 cadherin, and most likely can be considered as mixed mesothelial-fibroblast cultures. In contrast,  
220 primary culture starting from tissue of the first passage PM-PDX model resulted in typical epithelial  
221 cells with cobblestone organization with strong cell-cell adhesion that showed colony growth. The first  
222 5 to 8 initial subcultures showed no constant timing (among 2 to 3 weeks), the period in which cell  
223 proliferation was slow and unable to cover the entire culture flask surface. After this period, cell  
224 proliferation became quicker and in vitro passages for the maintenance of cell culture became regular

225 (every week). The cell culture, named as PM-LGSOC-01, has been in continuous culture for >30 months  
226 and >100 in vitro passages (Figure 2A). PM-LGSOC-01 cells had a doubling time of 42 hours at passage  
227 5 that was reduced to 23 hours at passage 22 and later passages. Table 2 summarizes the main findings  
228 regarding STR analysis. Comparison of STR profiles between PM-LGSOC-01 and other human cell lines  
229 did not match evaluation values greater than 0.82, confirming the uniqueness of PM-LGSOC-01 cell  
230 line. Results of western blotting (Figure 2B) illustrate a stable expression of cytoskeletal and cell-cell  
231 adhesion proteins over a wide range of passage numbers. Despite the presence of E-cadherin and its  
232 associated cytoplasmic catenins the PM-LGSOC-01 cells form aggregates but do not show compact  
233 spheres within 48h in contrast to positive controls used for compact sphere formation (Figure 2C).  
234 Chemotactic migration of PM-LGSOC-01 to a 10% FBS gradient was limited in contrast to SK-OV-3 luc  
235 IP1 cells characteristically used as a migratory ovarian cancer cell line (Figure 2D).

#### 236 ***In vitro* effect of trametinib on KRAS mutated PM-LGSOC-01 cells**

237 Evaluation for typical mutations of LGSOC found that the patient's primary tumor and peritoneal  
238 metastasis, PDX passage 1 and the PM-LGSOC-01 cell line early and late passages (3, 32 and 72) and its  
239 luc-EGFP transduced PM-LGSOC variant all carried the *KRAS* c.35G>T (p.(Gly12Val)) mutation, as  
240 illustrated in Figure 3A. Due to the presence of this mutation, the efficacy of the MEK inhibitors  
241 trametinib and selumetinib was further investigated. Indeed, trametinib dose-dependently inhibits  
242 ERK phosphorylation and cell confluency with an IC<sub>50</sub> of  $7.2 \pm 0.5$  nM (mean  $\pm$  SE) (Figure 3B).  
243 Selumetinib also affected cell confluency but only in higher molar concentrations. In agreement with  
244 the poor chemosensitivity of LGSOC only paclitaxel shows a sensitivity in the low nM range (IC<sub>50</sub> of  $6.3$   
245  $\pm 2.2$  nM (mean  $\pm$  SE)) in contrast to platinum based compounds with IC<sub>50</sub> > 2  $\mu$ M (Figure 3C). In  
246 agreement, the clonogenic assay confirmed the effect of trametinib and selumetinib on clone numbers  
247 (Figure 3C). Cell cycle analysis confirmed the impact of trametinib on cellular growth by stimulating a  
248 cell population into an increased G1 phase and decreased S and G2/M phase (Figure 3D).

249

250 **Impact of trametinib in an *in vivo* peritoneal metastasis model of LGSOC**

251 PM-LGSOC-01 cells were lentiviral transduced to obtain constitutive GFP- and Luciferase expression.  
252 These reporter cells were further used to create a peritoneal metastasis model from LGSOC in order  
253 to evaluate the effect of trametinib *in vivo*. Figure 4A illustrates the imaging data at different time  
254 points before and during the treatment period. In both groups, during the time course of the  
255 experiment no mice developed ascites. Animals received daily oral gavage based on vehicle or  
256 0.3 mg/kg trametinib in a volume of 100  $\mu$ L. Over time a clear increase in bioluminescence activity  
257 can be observed for the control group whereas a decrease in signal is observed in the trametinib  
258 treatment group. After 5 weeks of treatment animals were euthanised and relative total flux was  
259 significantly higher in the control group compared to the trametinib group (Figure 4B). On average  
260 a 4-fold increase in bioluminescent increase from the start of the experiments was observed for the  
261 control group whereas on average the bioluminescent signal decreased with about 30% in the  
262 trametinib group, relative to starting conditions. Figure 4C illustrates the histopathological (H&E) and  
263 immunohistochemical stainings (Ki67 and PAX8) representative for both the control and trametinib  
264 group. H&E shows nests of cells that organize into papillae surrounded by stroma characteristic of  
265 LGSOC. Ki67 labeling index was twice as high in the control group (30%) compared to the trametinib  
266 group (15%).

267

## 268 Discussion

269 The heterogeneous nature of ovarian cancer makes it challenging to predict therapeutic responses in  
270 patients (18, 19). In this regard, preclinical models accurately mimicking biological properties of in vivo  
271 human tumors are of great value for efficient drug discovery (20). To date, preclinical research in  
272 LGSOC has been limited. The low frequency and slow growth rate of these tumors have challenged the  
273 development of cell lines and animal xenograft models. LGSOC cell lines are not available at the  
274 American Type Culture Collection (ATCC) and are only available at some research groups worldwide  
275 (21, 22). Kopper et al. (2019) established organoid lines in basement membrane extracts representing  
276 both LGSOC and HGSOC from primary tumor, ascites and peritoneal metastasis (11). The organoid lines  
277 allow subcutaneous transplantation and can be used in drug screening assays. Our approach was  
278 slightly different. A tumor slurry from peritoneal metastatic tissue of LGSOC was subperitoneally  
279 injected into an immunodeficient SCID/Beige mouse leading to tumor growth. From this early-stage  
280 PDX a tissue-culture substrate adherent cell line was established that showed long term in vitro  
281 expansion and enabled manipulation and functional analysis. We also confirmed the histological  
282 features of the early-stage PDX such as micropapillae surrounded by stroma in the first passage and  
283 marked architectural complexity in the second passage most probably due to anastomosis of  
284 micropapillae forming the elongated and branching structures. The genomic aberration characterized  
285 by *KRAS* mutation is consistent in the PM-PDX and PM-LGSOC-01 cell line. Biomarker expression, such  
286 as positive PAX8 and WT1 combined with a wildtype p53 is consistent in the primary tissue versus the  
287 PM-PDX and PM-LGSOC-01, even after extended passage. Ovarian PDXs are predominantly originating  
288 from HGSOC as a low take rate and long latency is often associated with other histological subtypes.  
289 However, in our case HGSOC patients were strongly pretreated by chemotherapy and characterized  
290 by necrotic areas and areas containing cancer cells with low mitotic activity making it less likely to  
291 establish a PDX model from PM of HGSOC patients. In contrast, the LGSOC patient did not receive  
292 neoadjuvant chemotherapy before surgery leading to more viable tumor tissue, easily forming an  
293 early-stage transplantable PDX and generated tissue-culture adherent PM-LGSOC-01 cell line, low

294 sensitive to platinum derivatives. Other characteristics are clonogenicity and tumorigenicity, lack of  
295 serum-induced chemotactic migration and absence of compact sphere forming activity despite the  
296 presence of cell-cell adhesion molecule E-cadherin and its downstream catenins. PM-LGSOC-01 cell  
297 line allows genetic manipulation and easy in vivo monitoring of its luc-EGFP variant using  
298 bioluminescence imaging. The mouse passaging of PM tumor tissue was necessary to obtain a tissue-  
299 culture adherent cell line since cells cultured directly from patient PM tumor tissue ended into  
300 dominant growth of stromal cells such as fibroblasts and mesothelial cells that become senescent after  
301 further passaging.

302 Prior studies have reported that LGSOC tumors have a unique clinical, pathological and molecular  
303 profile compared to other ovarian cancers. LGSOC harbours *KRAS* mutations in 19 to 54.5% of the cases  
304 and lacks *TP53* mutations (23-28). With the focus on inhibiting *KRAS* signalling via downstream effector  
305 MEK, both allosterically active compounds trametinib and selumetinib were here investigated (29).  
306 Trametinib shows equal potency for targeting MEK1 and MEK2 and preferentially binds  
307 unphosphorylated MEK1/2 and thereby preventing Raf-dependent MEK phosphorylation and  
308 activation (30, 31). Selumetinib targets the unique inhibitor binding pocket adjacent to the Mg-ATP in  
309 MEK1/2. Sticking to this specific region causes a conformational change in unphosphorylated MEK1/2  
310 resulting in a catalytically inactive position and blocking MEK1/2 from accessing the ERK1/2 activation  
311 loop. Selumetinib does not block binding and phosphorylation by Raf, which is different from  
312 trametinib (32). In addition, selumetinib shows higher potency to target MEK1 compared to MEK2.  
313 These different binding properties of selumetinib compared to trametinib result in higher IC50 for  
314 selumetinib in MEK sensitive tumors (reported IC50 values of 50 nM for trametinib and 2.5  $\mu$ M for  
315 selumetinib using the A549 bronchioloalveolar carcinoma cell monolayer cultures (33)) which is in  
316 agreement with work done by Gilmartin et al. (30) and Yamaguchi et al. (34). The study of Fernandez  
317 et al. (35) marks differences in MEK efficacy in low-grade serous ovarian cancer cell lines as trametinib  
318 was found to be highly effective in blocking p-ERK1/2 compared to selumetinib (IC50 values were in  
319 the nM range for trametinib versus the  $\mu$ M-range for selumetinib). These findings are also in line with

320 our observations regarding a different sensitivity for both MEK inhibitors with the established PM-  
321 LGSOC-01 cells. In vivo evaluation of trametinib in PM-LGSOC-01 revealed a similar sensitivity  
322 suggesting that the peritoneal stroma does not affect the trametinib response. Due to the failure of  
323 MEK inhibitors such as binimetinib in a phase 3 clinical trial for LGSOC and the unknown molecular  
324 mechanisms related to this failure (8), we strongly believe that the current model will assist in the  
325 better understanding of responsiveness and resistance to MEK inhibitors.

326 Establishing and analysing additional LGSOC lines might substantiate our finding and may provide a  
327 unique opportunity to study LGSOC progression and chemosensitivity.

328 **Additional Information**

329 **Ethical approval and informed consent:** Informed consent of the patients to use tumor material was  
330 obtained after the study protocol was approved by the institutional review board of the Ghent  
331 University Hospital. Animal experiments were conducted in accordance with the local ethics  
332 committee (ECD 15/28, Ghent University Hospital).

333 **Conflict of interest:** The authors declare no conflict of interest.

334 **Funding:** The authors are indebted to the Research Foundation Flanders (FWO) for financial support  
335 [research project G016915N].

336 **Authors' contributions:** EDT acquired and interpreted *in vivo* and *in vitro* data, wrote the manuscript.  
337 KVdV and JVD performed pathological studies and interpreted pathological data. JVdM, JT, GW and  
338 GB acquired and interpreted *in vitro* and molecular data. HD and WC provided clinical interface,  
339 coordination and support. ODW coordinated the research project, designed experiments and wrote  
340 the manuscript. Critical revision of the manuscript and approval of the final version of the  
341 manuscript: all authors.

342 **Acknowledgments:** The authors would like to thank S. Decloedt for the technical assistance and the  
343 preclinical core imaging facility of Ghent University (INFINITY) for providing the *in vivo* imaging  
344 systems. We are grateful to the people who consented to donate their tissues to support this work.



345 **TABLE LEGENDS**

346 **Table 1.** Primary antibodies used in western blot (WB)

347 **Table 2.** STR profile for the PM-LGSOC-01 cell line

348

349 **TABLES**

350 **Table 1**

| <b>Primary antibodies</b>                       | <b>Source</b>              | <b>WB</b> |
|-------------------------------------------------|----------------------------|-----------|
| Rabbit anti- $\alpha$ -catenin                  | Sigma Aldrich              | 1:3000    |
| Mouse anti- $\alpha$ -smooth muscle actin (SMA) | Sigma                      | 1:1000    |
| Rabbit anti- $\beta$ -catenin                   | Sigma Aldrich              | 1:3000    |
| Mouse anti-E-cadherin                           | Invitrogen                 | 1:1000    |
| Mouse anti-estrogen receptor (ER)- $\alpha$     | Abcam                      | 1:1000    |
| Mouse anti-pan-cadherin                         | Sigma Aldrich              | 1:1000    |
| Mouse anti-pan-cytokeratin                      | Sigma Aldrich              | 1:1000    |
| Mouse anti-p53                                  | Sigma Aldrich              | 1:1000    |
| Mouse anti-vimentin                             | Sigma Aldrich              | 1:1000    |
| Mouse anti-GAPDH                                | Sigma                      | 1:1000    |
| Rabbit anti-phospho-p44/42 MAPK (ERK1/2)        | Cell signalling Technology | 1:3000    |
| Rabbit anti-p44/42 MAPK (ERK1/2)                | Cell signalling Technology | 1:3000    |

351

352

353 **Table 2**

| <b>Alleles<sup>a</sup></b> | <b>PM-LGSOC-01</b> |
|----------------------------|--------------------|
| D8S1179                    | 13,14              |
| D21S11                     | 28,32              |
| D7S820                     | 9,10               |
| CSF1PO                     | 10,11              |
| D3S1358                    | 14,15              |
| TH01                       | 6,7                |
| D13S317                    | 12,13              |
| D16S539                    | 10,11              |
| D2S1338                    | 24,25              |
| D19S433                    | 12,16              |
| vWA                        | 15,17              |
| TPOX                       | 8,10               |
| D18S51                     | 12,17              |
| Amelogenin                 | X,X                |
| D5S818                     | 11,12              |
| FGA                        | 23,24              |

354

355 <sup>a</sup>A detailed description of each allele is presented at the following link:

356 [http://www.cstl.nist.gov/div831/strbase/str\\_fact.htm](http://www.cstl.nist.gov/div831/strbase/str_fact.htm)

357 **FIGURE LEGENDS**

358 **Figure 1. Establishment of the PM-PDX model.** (A) Schematic representation of the protocol for PM-  
359 PDX model establishment. Freshly human peritoneal metastasis samples, originating from serous  
360 ovarian cancer, were collected and subperitoneally injected as a tumor slurry in SCID/Beige mice. The  
361 tumor is harvested once it is ready for passaging, tumor tissue is collected and prepared for  
362 subperitoneal injection in a new group of mice or processed into a single cell suspension. (B)  
363 Assessment of tumor volume over time using ultrasound imaging. (C) Tumor section slides were  
364 stained for H&E to compare histology of the PDX tumors with the corresponding patient metastasis.  
365 The lower row shows a close-up of the area within the black rectangle. Scale bars represent 1 mm for  
366 the upper row and 200  $\mu\text{m}$  for the lower row. (D) Comparative study of tumor sections stained for  
367 PAX8, WT1, p53, ER and PR, as indicated. Scale bars represent 100  $\mu\text{m}$ .

368 **Figure 2. Characterization of tumor-derived cell lines.** (A) Morphology of tumor-derived primary cells,  
369 directly derived from patient material or after one passage in mice. Scale bars represent 500  $\mu\text{m}$  for  
370 the tumor-derived primary cells and 200  $\mu\text{m}$  for the PM-LGSOC-01 cells. (B) Immunoblotting results for  
371 different *in vitro* passages of the PM-LGSOC-01 cell line and the tumor-derived primary cells.  
372 CT5.3hTERT cells were used as reference and MCF-7/AZ cells were used as a reference for ER- $\alpha$   
373 expression levels. GAPDH was used as the loading control. (C) Evaluation of the aggregation activity of  
374 the PM-LGSOC-01 cells using IncuCyte technology. HCT-8/E11 cells were included as positive controls  
375 for compact sphere formation. Upper and lower panel indicate two separate experiments. Scale bars  
376 represent 300  $\mu\text{m}$ . (D) Real-time monitoring of migration activity of SK-OV-3 luc IP1 cells and the PM-  
377 LGSOC-01 cells using the IncuCyte technology. The evaluation was performed using 0.1% FBS in culture  
378 medium on top and 10% FBS in culture medium at the bottom. Mean  $\pm$  SE of six technical replicates is  
379 shown.

380 **Figure 3. *In vitro* effect of trametinib on KRAS mutated PM-PDX derived cells.** (A) *KRAS* c.35G>T  
381 (p.(Gly12Val)) mutation analysis at patient material, different *in vitro* passages of the PM-LGSOC-01  
382 cell line (3, 32 and 72) and for the Luc-EGFP positive PM-LGSOC-01 cells. The colors blue and green

383 indicate the fraction wildtype versus mutant, respectively. (B) Immunoblotting results for p-ERK and  
384 ERK of the PM-LGSOC-01 cell line treated with 0.1% DMSO (control) and trametinib at a concentration  
385 of 0.1, 1 and 10 nM for 6 hours. GAPDH was used as the loading control. (C) On the left, real-time  
386 analysis of PM-PDX derived cell confluency using IncuCyte technology. PM-LGSOC-01 cells were  
387 treated with 0.1% DMSO (control), trametinib, selumetinib, carboplatin and paclitaxel at  
388 concentrations of 0.1, 1, 10, 100 and 1000 nM. Mean  $\pm$  SE of at least four technical replicates is shown.  
389 On the right, results on the clonogenicity assay. PM-LGSOC-01 cells were treated for 1 week with  
390 trametinib or selumetinib at a concentration of 1, 10 and 100 nM. Mean + SE of three technical  
391 replicates is shown. Statistical analysis was performed using one-way ANOVA at the  $\alpha = 0.05$   
392 significance level. (D) Results of the cell cycle distribution analysis by flow cytometry. Quantitation of  
393 the sub-population fractions of the histograms. PM-LGSOC-01 cells were treated for 24 hours with  
394 0.1% DMSO (control) or 5 nM trametinib. Many cells were blocked in the G0/G1 phase and a reduction  
395 in the S and G2/M phase was observed with increasing concentration of trametinib.

396 **Figure 4. Impact of trametinib in an *in vivo* peritoneal metastasis model.** (A) Monitoring of *in vivo*  
397 bioluminescence in SCID/Beige mice after intraperitoneal inoculation of Luciferase-EGFP positive PM-  
398 LGSOC-01 cells and treated daily with vehicle or trametinib (0.3 mg/kg/day) via oral gavage. (B) Bar  
399 plot indicating the increase in bioluminescent signal, detected after 5 weeks of daily treatment,  
400 corrected for the observed signal before therapy per individual mouse (relative total flux). Data  
401 represent mean + SE of five animals/group. (C) Histopathological (H&E) and immunohistochemical  
402 (Ki67 and PAX8) analysis of tumor sections representative for the control and treatment group. Scale  
403 bars represent 100  $\mu$ m.

404

405

406

407 **FIGURES**

408 **Figure 1.**

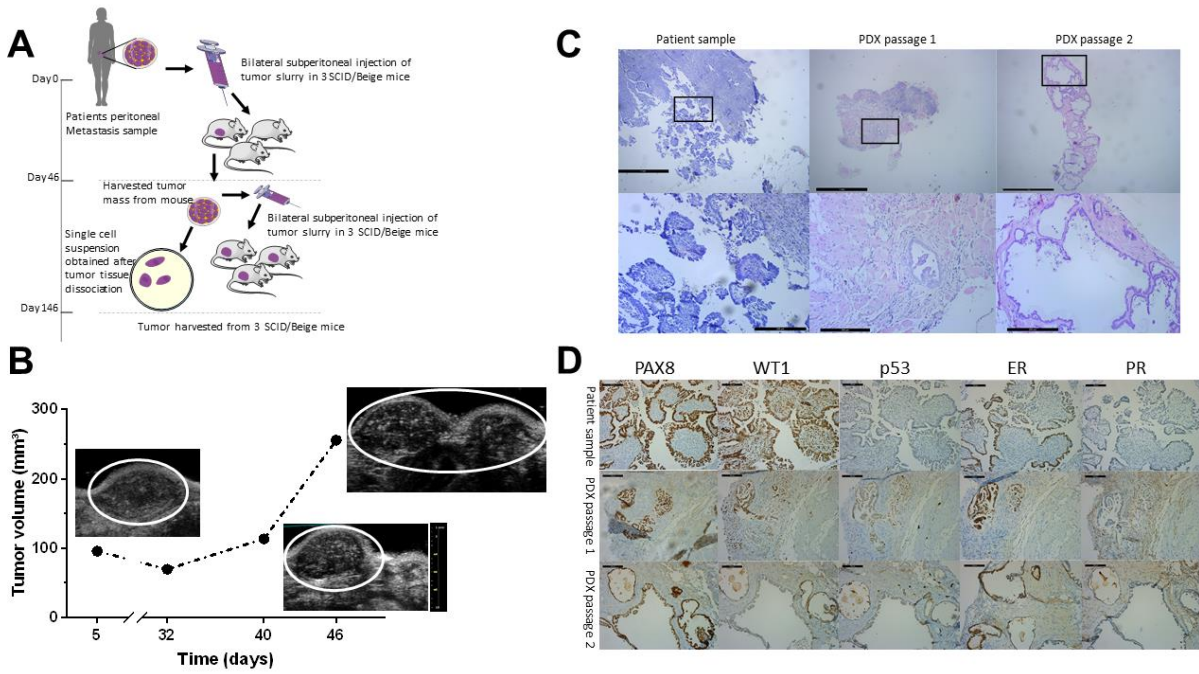

409

410 **Figure 2.**

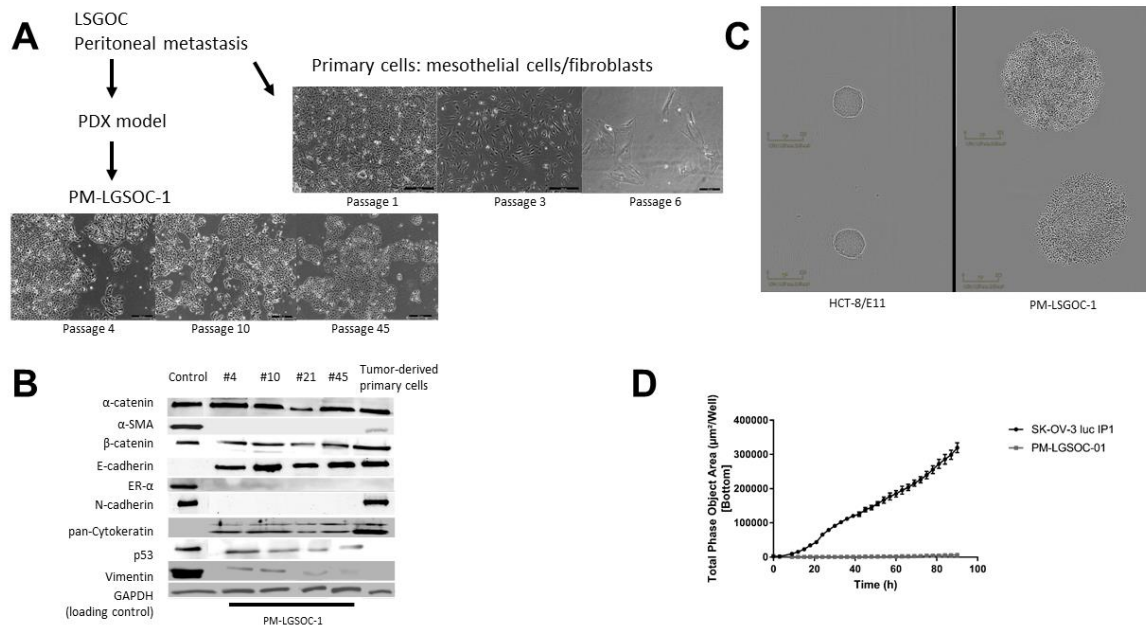

411

412

413 **Figure 3.**

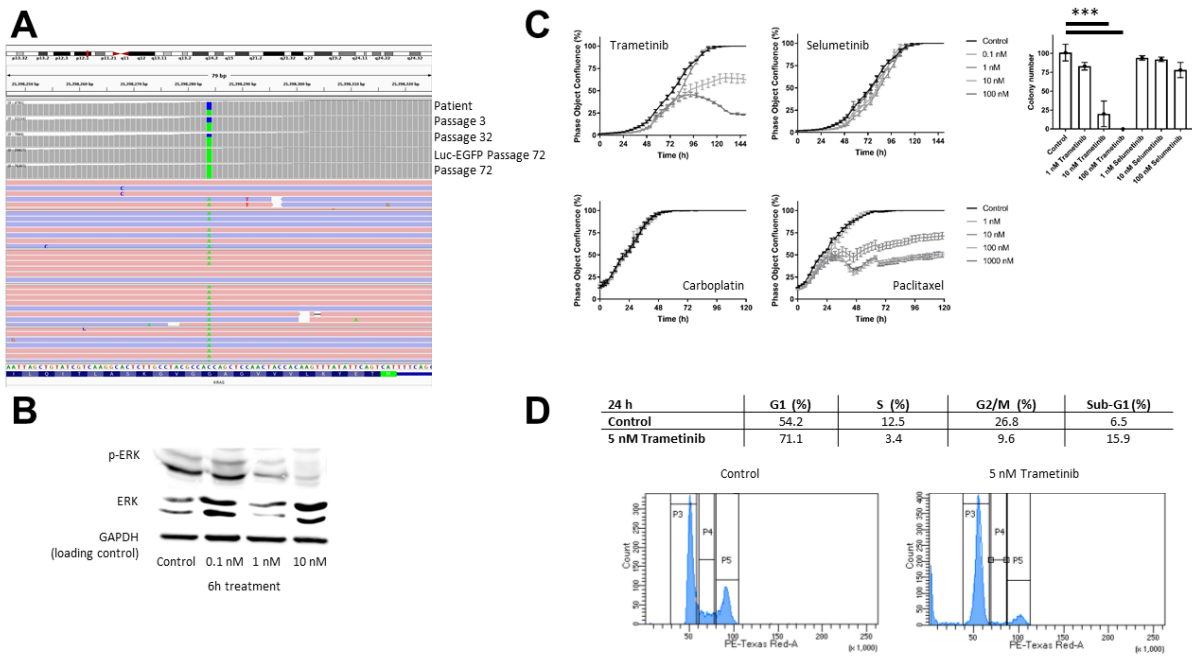

414

415 **Figure 4.**

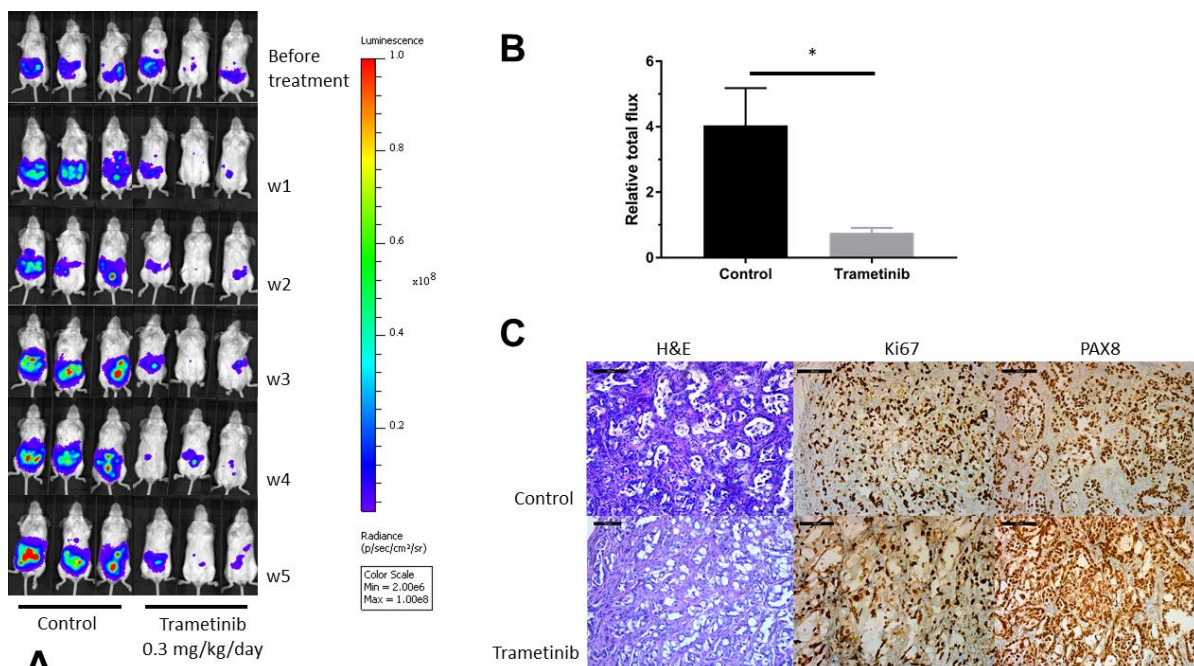

416

## 417 References

- 418 1. Bray F, Ferlay J, Soerjomataram I, Siegel RL, Torre LA, Jemal A. Global cancer statistics 2018:  
419 GLOBOCAN estimates of incidence and mortality worldwide for 36 cancers in 185 countries. *Ca-a*  
420 *Cancer Journal for Clinicians*. 2018;68(6):394.
- 421 2. Kim J, Park EY, Kim O, Schilder JM, Coffey DM, Cho C-H, et al. Cell Origins of High-Grade Serous  
422 Ovarian Cancer. *Cancers (Basel)*. 2018;10(11):433.
- 423 3. Soslow RA. Histologic Subtypes of Ovarian Carcinoma. *International Journal of Gynecological*  
424 *Pathology*. 2008;27:161.
- 425 4. Vang R, Shih I-M, Kurman RJ. Ovarian low-grade and high-grade serous carcinoma:  
426 pathogenesis, clinicopathologic and molecular biologic features, and diagnostic problems. *Adv Anat*  
427 *Pathol*. 2009;16(5):267.
- 428 5. Jayson GC, Kohn EC, Kitchener HC, Ledermann JA. Ovarian cancer. *The Lancet*.  
429 2014;384(9951):1376.
- 430 6. van Baal J, van Noorden CJF, Nieuwland R, Van de Vijver KK, Sturk A, van Driel WJ, et al.  
431 Development of Peritoneal Carcinomatosis in Epithelial Ovarian Cancer: A Review. *Journal of*  
432 *Histochemistry & Cytochemistry*. 2018;66(2):18.
- 433 7. Vetter MH, Hays JL. Use of Targeted Therapeutics in Epithelial Ovarian Cancer: A Review of  
434 Current Literature and Future Directions. *Clinical Therapeutics*. 2018;40(3):361.
- 435 8. Array BioPharma Announces Decision To Discontinue MILO Study in Ovarian Cancer: CISION  
436 PR NewsWire; 2017 [Accessed on September 9, 2019]. Available from:  
437 [https://www.prnewswire.com/news-releases/array-biopharma-announces-decision-to-discontinue-](https://www.prnewswire.com/news-releases/array-biopharma-announces-decision-to-discontinue-milo-study-in-ovarian-cancer-300244593.html)  
438 [milo-study-in-ovarian-cancer-300244593.html](https://www.prnewswire.com/news-releases/array-biopharma-announces-decision-to-discontinue-milo-study-in-ovarian-cancer-300244593.html).
- 439 9. Ibarrola-Villava M, Cervantes A, Bardelli A. Preclinical models for precision oncology.  
440 *Biochimica Et Biophysica Acta-Reviews on Cancer*. 2018;1870(2):239.
- 441 10. Perez M, Navas L, Carnero A. Patient-derived xenografts as models for personalized medicine  
442 research in cancer. *Cancer Translational Medicine*. 2016;2(6):197.
- 443 11. Kopper O, de Witte CJ, Löhmußaar K, Valle-Inclan JE, Hami N, Kester L, et al. An organoid  
444 platform for ovarian cancer captures intra- and interpatient heterogeneity. *Nature Medicine*.  
445 2019;25(5):838.
- 446 12. Siolas D, Hannon GJ. Patient-Derived Tumor Xenografts: Transforming Clinical Samples into  
447 Mouse Models. *Cancer Research*. 2013;73(17):5315.
- 448 13. Jung J, Seol HS, Chang S. The Generation and Application of Patient-Derived Xenograft Model  
449 for Cancer Research. *Cancer Research and Treatment*. 2018;50(1):1.
- 450 14. Talmadge JE, Singh RK, Fidler IJ, Raz A. Murine models to evaluate novel and conventional  
451 therapeutic strategies for cancer. *American Journal of Pathology*. 2007;170(3):793.
- 452 15. Day CP, Merlino G, Van Dyke T. Preclinical Mouse Cancer Models: A Maze of Opportunities and  
453 Challenges. *Cell*. 2015;163(1):39.
- 454 16. De Leeneer K, Hellemans J, Steyaert W, Lefever S, Vereecke I, Debals E, et al. Flexible, Scalable,  
455 and Efficient Targeted Resequencing on a Benchtop Sequencer for Variant Detection in Clinical  
456 Practice. *Human Mutation*. 2015;36(3):379.
- 457 17. RStudioTeam. RStudio: Integrated Development for R. In: RStudio I, editor. Boston, MA2016.
- 458 18. Prat J. Ovarian carcinomas: five distinct diseases with different origins, genetic alterations, and  
459 clinicopathological features. *Virchows Archiv*. 2012;460(3):237.
- 460 19. Hasan N, Ohman AW, Dinulescu DM. The promise and challenge of ovarian cancer models.  
461 *Translational Cancer Research*. 2015;4(1):14.
- 462 20. Gao H, Korn JM, Ferretti S, Monahan JE, Wang Y, Singh M, et al. High-throughput screening  
463 using patient-derived tumor xenografts to predict clinical trial drug response. *Nature Medicine*.  
464 2015;21:1318.
- 465 21. da Silva RF, Cardozo DM, Rodrigues GOL, Souza-Araújo CNd, Migita NA, Andrade LALda, et al.  
466 CAISMOV24, a new human low-grade serous ovarian carcinoma cell line. *BMC Cancer*. 2017;17(1):756.



- 467 22. Fernandez ML, Dawson A, Hoenisch J, Kim H, Bamford S, Salamanca C, et al. Markers of MEK  
468 inhibitor resistance in low-grade serous ovarian cancer: EGFR is a potential therapeutic target. *Cancer*  
469 *Cell Int.* 2019;19:10.
- 470 23. Malpica A, Wong K-K. The molecular pathology of ovarian serous borderline tumors†. *Annals*  
471 *of Oncology.* 2016;27(suppl\_1):i16.
- 472 24. Haas C, Diebold J, Hirschmann A, Rohrbach H, Löhns U. In serous ovarian neoplasms the  
473 frequency of Ki-ras mutations correlates with their malignant potential. *Virchows Archiv.*  
474 1999;434(2):117.
- 475 25. Singer G, Oldt R III, Cohen Y, Wang B G, Sidransky D, Kurman R J, et al. Mutations in BRAF and  
476 KRAS Characterize the Development of Low-Grade Ovarian Serous Carcinoma. *JNCI: Journal of the*  
477 *National Cancer Institute.* 2003;95(6):484.
- 478 26. Wong K-K, Tsang YTM, Deavers MT, Mok SC, Zu Z, Sun C, et al. BRAF Mutation Is Rare in  
479 Advanced-Stage Low-Grade Ovarian Serous Carcinomas. *The American Journal of Pathology.*  
480 2010;177(4):1611.
- 481 27. Vereczkey I, Serester O, Dobos J, Gallai M, Szakács O, Szentirmay Z, et al. Molecular  
482 Characterization of 103 Ovarian Serous and Mucinous Tumors. *Pathology & Oncology Research.*  
483 2011;17(3):551.
- 484 28. Sundov D, Caric A, Mrklic I, Gugic D, Capkun V, Hofman ID, et al. P53, MAPK, topoisomerase II  
485 alpha and Ki67 immunohistochemical expression and KRAS/BRAF mutation in ovarian serous  
486 carcinomas. *Diagn Pathol.* 2013;8:21.
- 487 29. Miller CR, Oliver KE, Farley JH. MEK1/2 inhibitors in the treatment of gynecologic malignancies.  
488 *Gynecologic Oncology.* 2014;133(1):128.
- 489 30. Gilmartin AG, Bleam MR, Groy A, Moss KG, Minthorn EA, Kulkarni SG, et al. GSK1120212 (JTP-  
490 74057) Is an Inhibitor of MEK Activity and Activation with Favorable Pharmacokinetic Properties for  
491 Sustained *In Vivo* Pathway Inhibition. *Clinical Cancer Research.* 2011;17(5):989.
- 492 31. Yoshida T, Kakegawa J, Yamaguchi T, Hantani Y, Okajima N, Sakai T, et al. Identification and  
493 characterization of a novel chemotype MEK inhibitor able to alter the phosphorylation state of  
494 MEK1/2. *Oncotarget.* 2012;3(12):1533.
- 495 32. Yeh TC, Marsh V, Bernat BA, Ballard J, Colwell H, Evans RJ, et al. Biological Characterization of  
496 ARRY-142886 (AZD6244), a Potent, Highly Selective Mitogen-Activated Protein Kinase Kinase 1/2  
497 Inhibitor. *Clinical Cancer Research.* 2007;13(5):1576.
- 498 33. Mas C, Boda B, CaulFuty M, Huang S, Wiszniewski L, Constant S. Antitumour efficacy of the  
499 selumetinib and trametinib MEK inhibitors in a combined human airway–tumour–stroma lung cancer  
500 model. *Journal of Biotechnology.* 2015;205:111.
- 501 34. Yamaguchi T, Kakefuda R, Tajima N, Sowa Y, Sakai T. Antitumor activities of JTP-74057  
502 (GSK1120212), a novel MEK1/2 inhibitor, on colorectal cancer cell lines in vitro and in vivo.  
503 *International Journal of Oncology.* 2011;39(1):23.
- 504 35. Fernández ML, DiMattia GE, Dawson A, Bamford S, Anderson S, Hennessy BT, et al. Differences  
505 in MEK inhibitor efficacy in molecularly characterized low-grade serous ovarian cancer cell lines. *Am J*  
506 *Cancer Res.* 2016;6(10):2235.

507
